# Supplementary material for: Purification and characterization of a novel lipopeptide from Streptomyces amritsarensis sp. nov. active against methicillin-resistant Staphylococcus aureus
Source: PubMed Central journal article supplement (PMC4077001; doi:10.1186/s13568-014-0050-y), 2014-06-28
Supplement: s13568-014-0050-y-S1.pdf [file s13568-014-0050-y-S1.pdf]

**Title: Purification and characterization of a novel lipopeptide from *Streptomyces amritsarensis* sp. nov. active against methicillin-resistant *Staphylococcus aureus***

**Journal: AMB Express**

**Authors: Deepika Sharma<sup>1</sup> Santi M Mandal<sup>2</sup> and Rajesh Kumari Manhas<sup>1\*</sup>**

<sup>1</sup>Department of Microbiology, Guru Nanak Dev University, Amritsar, Punjab, 143005, India

<sup>2</sup>Central Research Facility, Indian Institute of Technology, Kharagpur, West Bengal 721302, India.

**\*Corresponding author:**

Dr. Rajesh Kumari Manhas

Associate Professor,

Department of Microbiology

Guru Nanak Dev University, Amritsar, Punjab, 143005, India

Email: rkmanhas@rediffmail.com

Tel: +91-183-2258802-09 Ext.3450; Fax: +91-183-2258819-20.

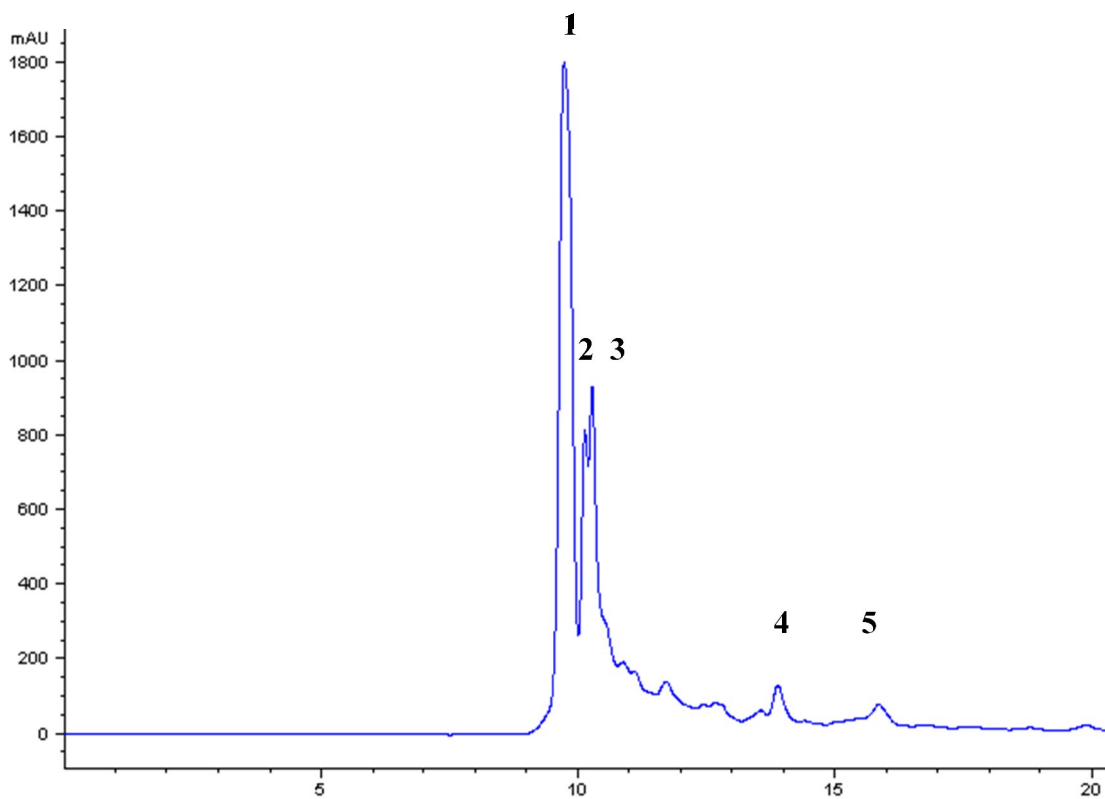

**Fig. S1** Ellution profile of the partially purified compound using a HPLC reverse phase chromatography on C18 column monitoring by absorbance at 280 nm

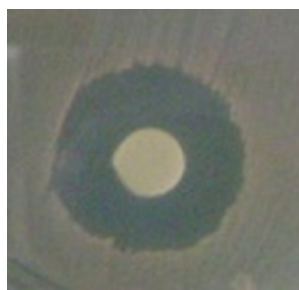

**a**

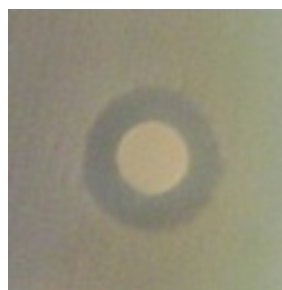

**b**

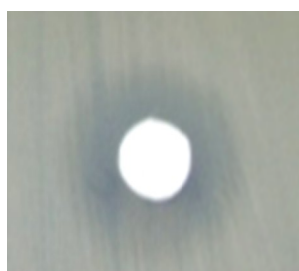

**c**

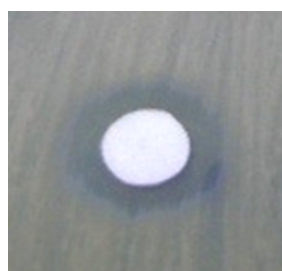

**d**

**Fig. S2 Antibacterial activity of lipopeptide against: (a) *B. subtilis*, (b) *S. epidermidis* c) *M. smegmatis* (d) MRSA**
